# Supplementary material for: Evolutionary Insight into the Trypanosomatidae Using Alignment-Free Phylogenomics of the Kinetoplast
Source: MDPI journal article supplement (doi:10.3390/pathogens8030157), 2019-09-18

# Evolutionary insight into the Trypanosomatidae using alignment-free phylogenomics of the kinetoplast

Alexa Kaufer <sup>1,\*</sup>, Damien Stark <sup>2</sup> and John Ellis <sup>1</sup>

## Supplementary Materials S1 – S5

S1 – Table of all trypanosomatid species used in this study

\*Sequences assembled in the study

S2 -Table of the overall nucleotide frequency and skew throughout the maxicircle genome of various trypanosomatid species.

S3 - Self dottup plot comparative analysis of the entire maxicircle genome (right panel) and divergent region (left panel) of various trypanosomatid species

S4 - Analysis of repeated sequences in the maxicircle divergent region

S5 - Determination of optimal feature/k-mer length ( $k$ ) for 46 trypanosomatid species.

(A) Graph shows the determination of the minimum feature/k-mer length for DNA. The optimal lower-feature length ( $k$ ) is considered the point where the most features can be found in most genomes (i.e. peak of curve). (B) Graph shows the determination of the maximum feature/k-mer length for DNA. The optimal upper-feature length ( $k$ ) is considered the point where the genome curves start having zero REF or begins falling to <10% of their REF maximum values [24].

S1 – Table of all trypanosomatid species used in this study.

| Species                  | Genbank/TriTryp | Species                      | Genbank/TriTryp |
|--------------------------|-----------------|------------------------------|-----------------|
| <i>A. deanei</i>         | KJ778684        | <i>L. pyrrhocoris</i>        | BK010873        |
| <i>B. ayalai</i>         | Baya_253        | <i>L. seymouri</i>           | Lsey_0394       |
| <i>C. fasciculata</i>    | CfaCI_maxi      | <i>L. shawi</i>              | BK010883        |
| <i>E. herreri</i>        | MK514112        | <i>L. tarentolae</i>         | MK514114        |
| <i>E. monterogeii</i>    | EMOLV88         | <i>L. tropica</i>            | MK514115*       |
| <i>E. schaudinni</i>     | BK010874        | <i>L. turanica</i>           | BK010887        |
| <i>H. megaseliae</i>     | ERX922862       | <i>P. confusum</i>           | SRX3339697      |
| <i>L. aethiopica</i>     | BK010882*       | <i>P. deanei</i>             | BK010886        |
| <i>L. amazonensis</i>    | SRX5187732*     | <i>P. hertigi</i>            | BK010885        |
| <i>L. arabica</i>        | BK010878        | <i>T. brucei_brucei</i>      | M94286.1        |
| <i>L. braziliensis</i>   | MK514111*       | <i>T. brucei_rhodesiense</i> | SRX3199071*     |
| <i>L. donovani</i>       | CP022652.1      | <i>T. copemani</i>           | MG948557        |
| <i>L. enriettii</i>      | BK010880        | <i>T. cruzi_CL</i>           | DQ343645.1      |
| <i>L. guyanensis</i>     | BK010876*       | <i>T. cruzi_Esmeraldo</i>    | DQ343646        |
| <i>L. infantum</i>       | BK010877*       | <i>T. cruzi_Marinkellei</i>  | KC427240        |
| <i>L. lainsoni</i>       | BK010879        | <i>T. cruzi_Silvio</i>       | FJ203996        |
| <i>L. macropodum</i>     | SRX5006815*     | <i>T. grayi</i>              | SRX620256*      |
| <i>L. major</i>          | MK514113        | <i>T. lewisi</i>             | KR072974        |
| <i>L. martiniquensis</i> | SRX5006816*     | <i>T. rangeli</i>            | KJ803830        |
| <i>L. mexicana</i>       | SRX5187730*     | <i>T. vivax_Liem</i>         | KM386509        |
| <i>L. panamensis</i>     | BK010875        | <i>T. vivax_MTI</i>          | KM386508        |
| <i>L. peruviana</i>      | BK010881        | <i>Z. australiensis</i>      | MK514117        |
| <i>L. pifanoi</i>        | BK010884        | <i>P. francai</i>            | SRX2165265*     |

**S2. The overall nucleotide frequency and skew throughout the maxicircle genome of various trypanosomatid species.**

|         | Ltur  | Lara  | Lmaj  | Ltro  | Laet  | Linf  | Ldon  | Lmex  | Lpif  | Lama  | Ltar  | Lguy  | Lpan  | Lsha | Lbra |
|---------|-------|-------|-------|-------|-------|-------|-------|-------|-------|-------|-------|-------|-------|------|------|
| % A     | 33    | 37    | 33    | 27    | 27    | 35    | 44    | 24    | 35    | 39    | 38    | 35    | 37    | 36   | 40   |
| % C     | 10    | 7     | 10    | 36    | 8     | 9     | 12    | 10    | 10    | 9     | 9     | 8     | 8     | 8    | 9    |
| % G     | 14    | 11    | 14    | 6     | 17    | 13    | 9     | 20    | 12    | 11    | 12    | 12    | 12    | 12   | 11   |
| % T     | 43    | 45    | 43    | 31    | 48    | 43    | 35    | 46    | 43    | 41    | 41    | 45    | 43    | 44   | 40   |
| % A + T | 76    | 82    | 76    | 58    | 75    | 78    | 19    | 70    | 78    | 80    | 79    | 80    | 80    | 80   | 80   |
| % G + C | 24    | 18    | 24    | 42    | 25    | 22    | 21    | 30    | 22    | 20    | 21    | 20    | 20    | 20   | 20   |
| AT skew | -0.13 | -0.09 | -0.13 | -0.07 | -0.28 | -0.10 | 0.11  | -0.31 | -0.10 | -0.03 | -0.04 | -0.13 | -0.08 | -0.1 | 0    |
| GC skew | 0.17  | 0.22  | 0.17  | -0.71 | 0.36  | 0.18  | -0.14 | 0.33  | 0.09  | 0.10  | 0.14  | 0.2   | 0.2   | 0.2  | 0.1  |

  

|         | Lper | Llai  | Lmar  | Lmac  | Lenr  | Pher  | Pdea | Esch  | Emon  | Eher  | Zaus  | Lsey  | Lpyr  | Cfas  | Hmeg |
|---------|------|-------|-------|-------|-------|-------|------|-------|-------|-------|-------|-------|-------|-------|------|
| % A     | 36   | 36    | 34    | 34    | 35    | 38    | 39   | 37    | 38    | 36    | 33    | 34    | 34    | 35    | 38   |
| % C     | 8    | 9     | 9     | 10    | 10    | 10    | 11   | 10    | 9     | 10    | 12    | 11    | 12    | 12    | 13   |
| % G     | 12   | 13    | 14    | 14    | 13    | 13    | 13   | 12    | 12    | 13    | 15    | 13    | 14    | 13    | 14   |
| % T     | 44   | 42    | 43    | 42    | 42    | 39    | 37   | 41    | 41    | 41    | 40    | 42    | 40    | 40    | 35   |
| % A + T | 80   | 78    | 77    | 76    | 77    | 77    | 76   | 78    | 79    | 77    | 73    | 76    | 74    | 75    | 73   |
| % G + C | 20   | 22    | 23    | 24    | 23    | 23    | 24   | 22    | 21    | 23    | 27    | 24    | 26    | 25    | 27   |
| AT skew | -0.1 | -0.08 | -0.11 | -0.10 | -0.09 | -0.01 | 0.02 | -0.05 | -0.04 | -0.06 | -0.09 | -0.11 | -0.08 | -0.06 | 0.04 |
| GC skew | 0.2  | 0.18  | 0.21  | 0.17  | 0.13  | 0.13  | 0.08 | 0.09  | 0.14  | 0.13  | 0.11  | 0.08  | 0.08  | 0.04  | 0.04 |

  

|         | Adea  | Baya | Tvmt  | Tvli  | Tbru | Tgra | Tcop | Tlew | Tran  | Tcma | Tces | Tcsi | Tccl | Pcon |
|---------|-------|------|-------|-------|------|------|------|------|-------|------|------|------|------|------|
| % A     | 34    | 41   | 38    | 38    | 42   | 39   | 37   | 41   | 45    | 39   | 40   | 27   | 39   | 36   |
| % C     | 16    | 9    | 10    | 10    | 9    | 12   | 13   | 12   | 13    | 10   | 11   | 9    | 11   | 13   |
| % G     | 15    | 13   | 12    | 13    | 14   | 13   | 15   | 12   | 11    | 13   | 13   | 14   | 14   | 15   |
| % T     | 35    | 37   | 40    | 39    | 35   | 36   | 35   | 35   | 31    | 38   | 36   | 50   | 36   | 36   |
| % A + T | 69    | 78   | 78    | 77    | 77   | 75   | 72   | 76   | 76    | 77   | 76   | 77   | 75   | 72   |
| % G + C | 31    | 22   | 22    | 23    | 23   | 25   | 28   | 24   | 24    | 23   | 24   | 23   | 25   | 28   |
| AT skew | -0.01 | 0.05 | -0.02 | -0.01 | 0.09 | 0.04 | 0.03 | 0.08 | 0.18  | 0.01 | 0.05 | 0.30 | 0.04 | 0    |
| GC skew | -0.03 | 0.18 | 0.09  | 0.13  | 0.22 | 0.04 | 0.07 | 0    | -0.08 | 0.13 | 0.08 | 0.22 | 75   | 0.07 |

Abbreviated species: Ltur (*L. turanica*); Lara (*L. arabica*); Lmaj (*L. major*); Ltro (*L. tropica*); Laet (*L. aethiopica*); Linf (*L. infantum*); Ldon (*L. donovani*); Lmex (*L. mexicana*); Lpif (*L. pifanoi*); Lama (*L. amazonensis*); Ltar (*L. tarentolae*); Lguy (*L. guyanensis*); Lpan (*L. panamensis*); Lsha (*L. shawi*); Lbra (*L. braziliensis*); Lper (*L. peruviana*); Llai (*L. lainsoni*); Lmar (*L. martiniquensis*); Lmac (*L. macropodum*); Lenr (*L. enriettii*); Pher (*P. hertigi*); Pdea (*P. deanei*); Esch (*E. schaudinni*); Emon (*E. monterogeii*); Eher (*E. herreri*); Zaus (*Z. australiensis*); Lsey (*L. seymouri*); Lpyr (*L. pyrrhocoris*); Cfas (*C. fasciculata*); Hmeg (*H. megaseliae*); Adea (*A. deanei*); Baya (*B. ayalai*); Tvmt (*T. vivax MT1*); Tvli (*T. vivax Liem*); Tbru (*T. brucei brucei*); Tgra (*T. grayi*); Tcop (*T. copemani*); Tlew (*T. lewisi*); Tran (*T. rangeli*); Tcma (*T. cruzi marinkellei*); Tces (*T. cruzi esmeraldo*); Tcsi (*T. cruzi Silvio*); Tccl (*T. cruzi CL*); Pcon (*P. confusum*)

S3 - Self dottup plot comparative analysis of the entire maxicircle genome (right panel) and divergent region (left panel) of various trypanosomatid species

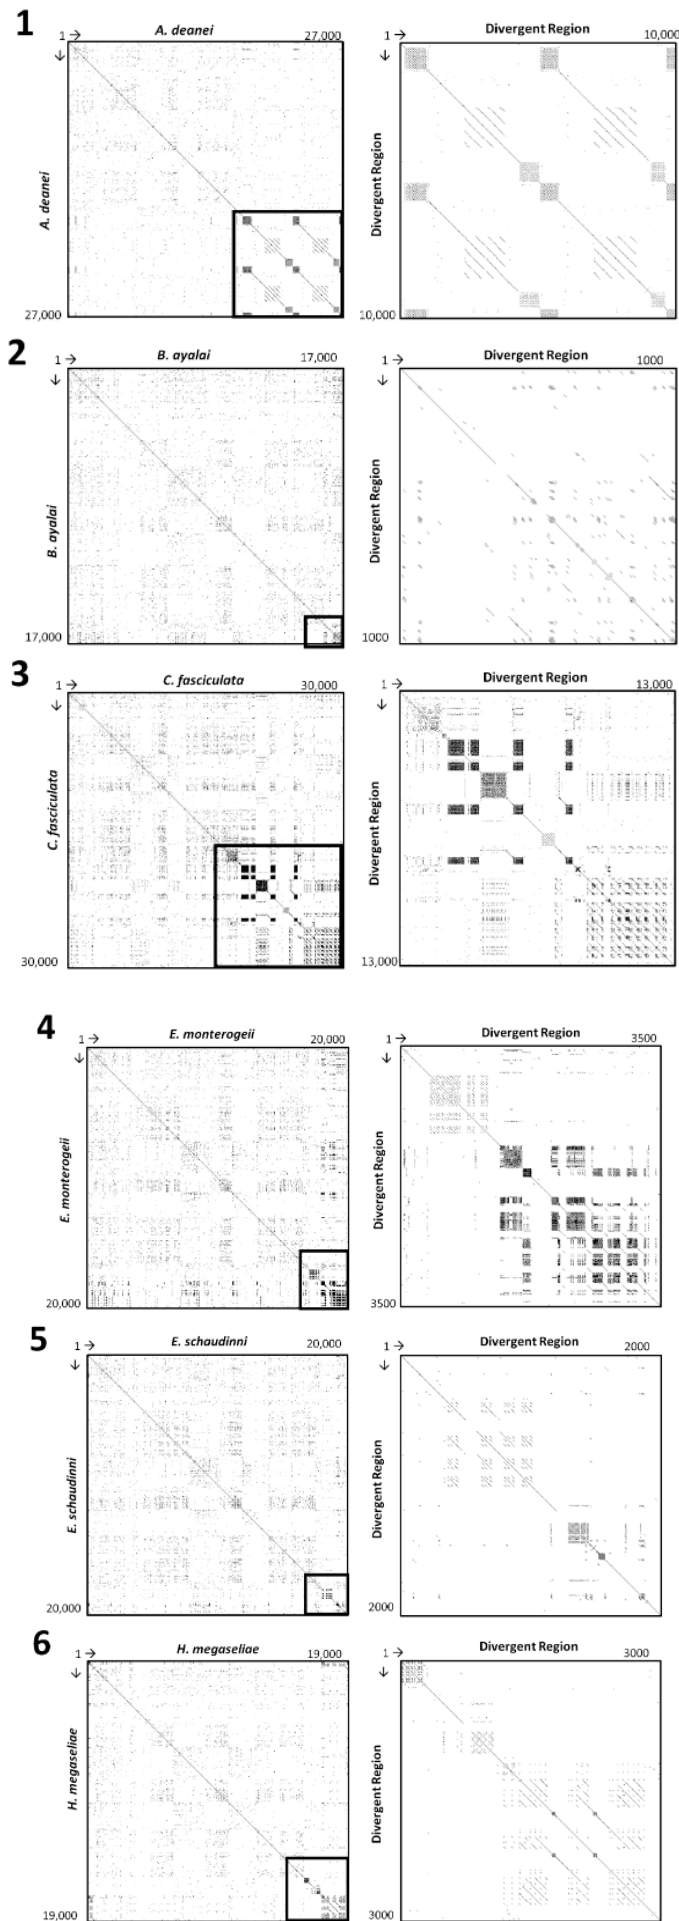

7

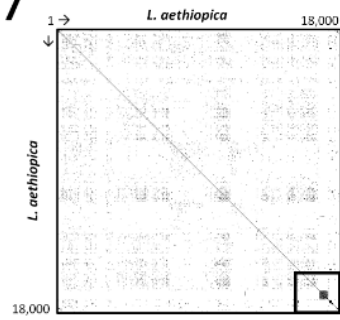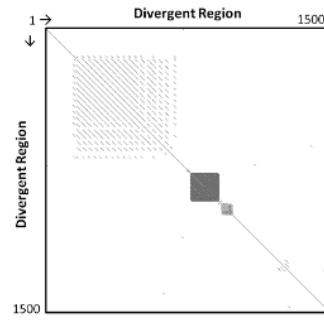

8

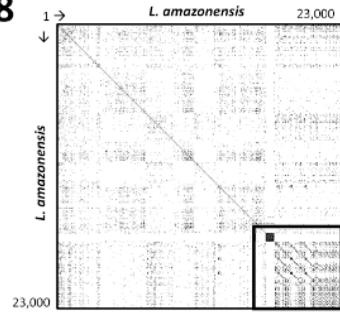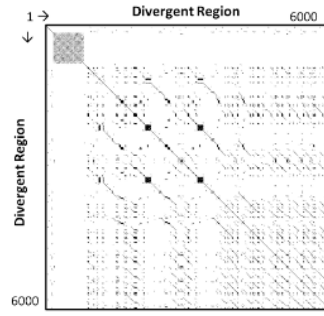

9

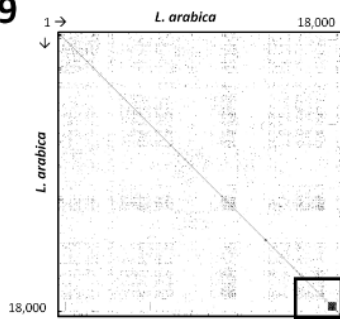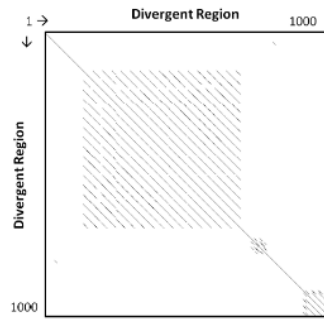

10

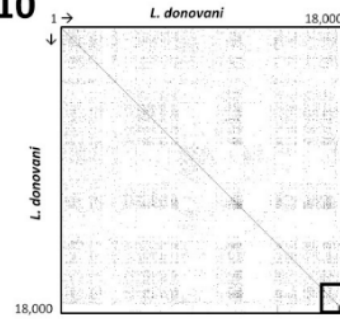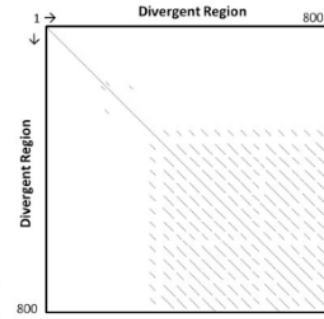

11

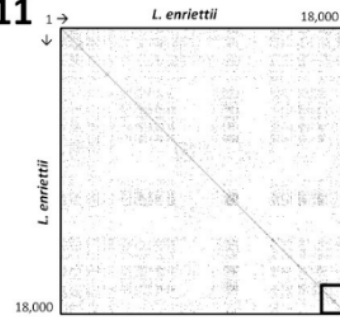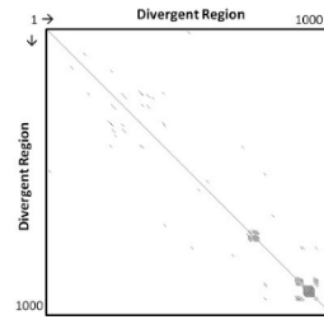

12

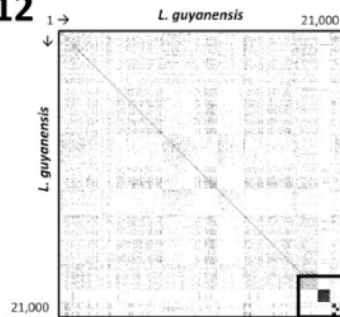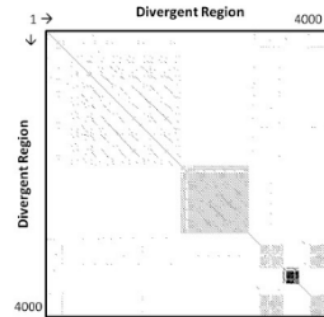

13

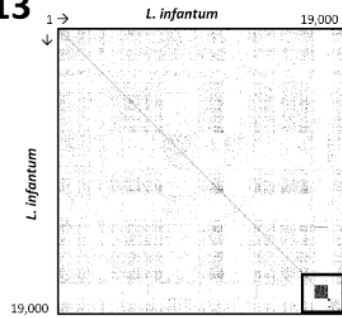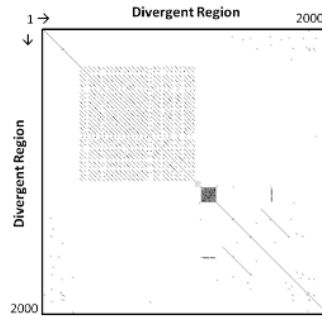

14

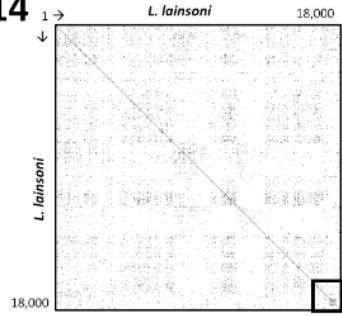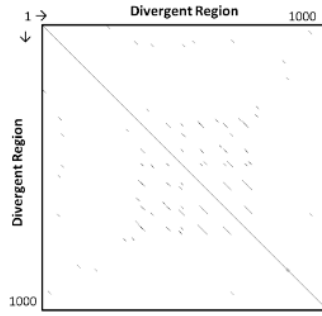

15

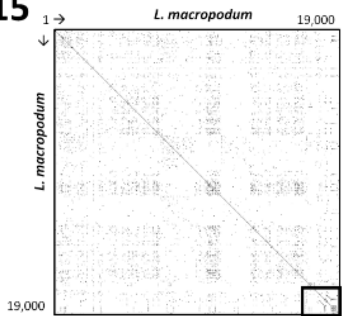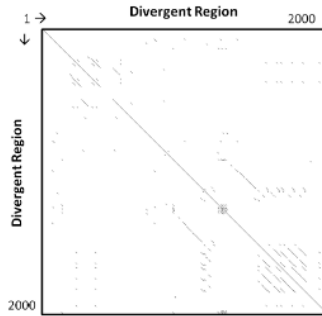

16

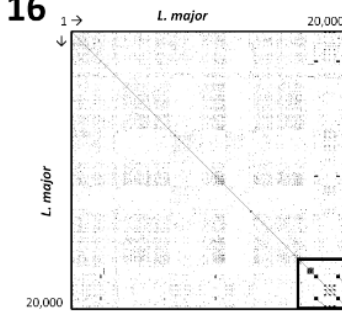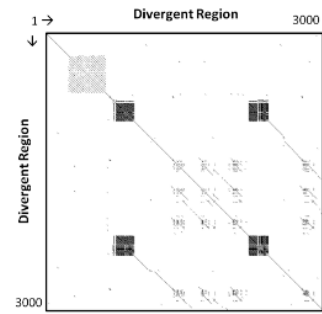

17

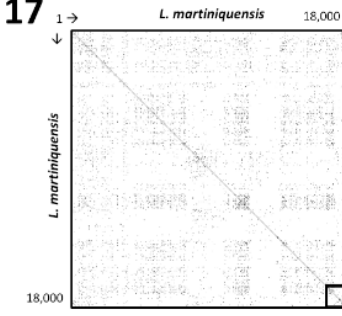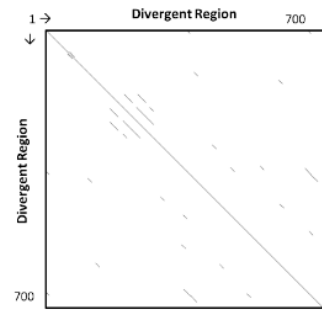

18

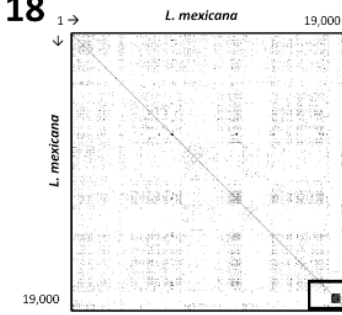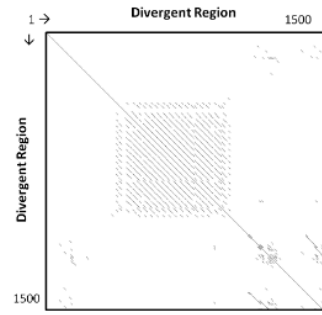

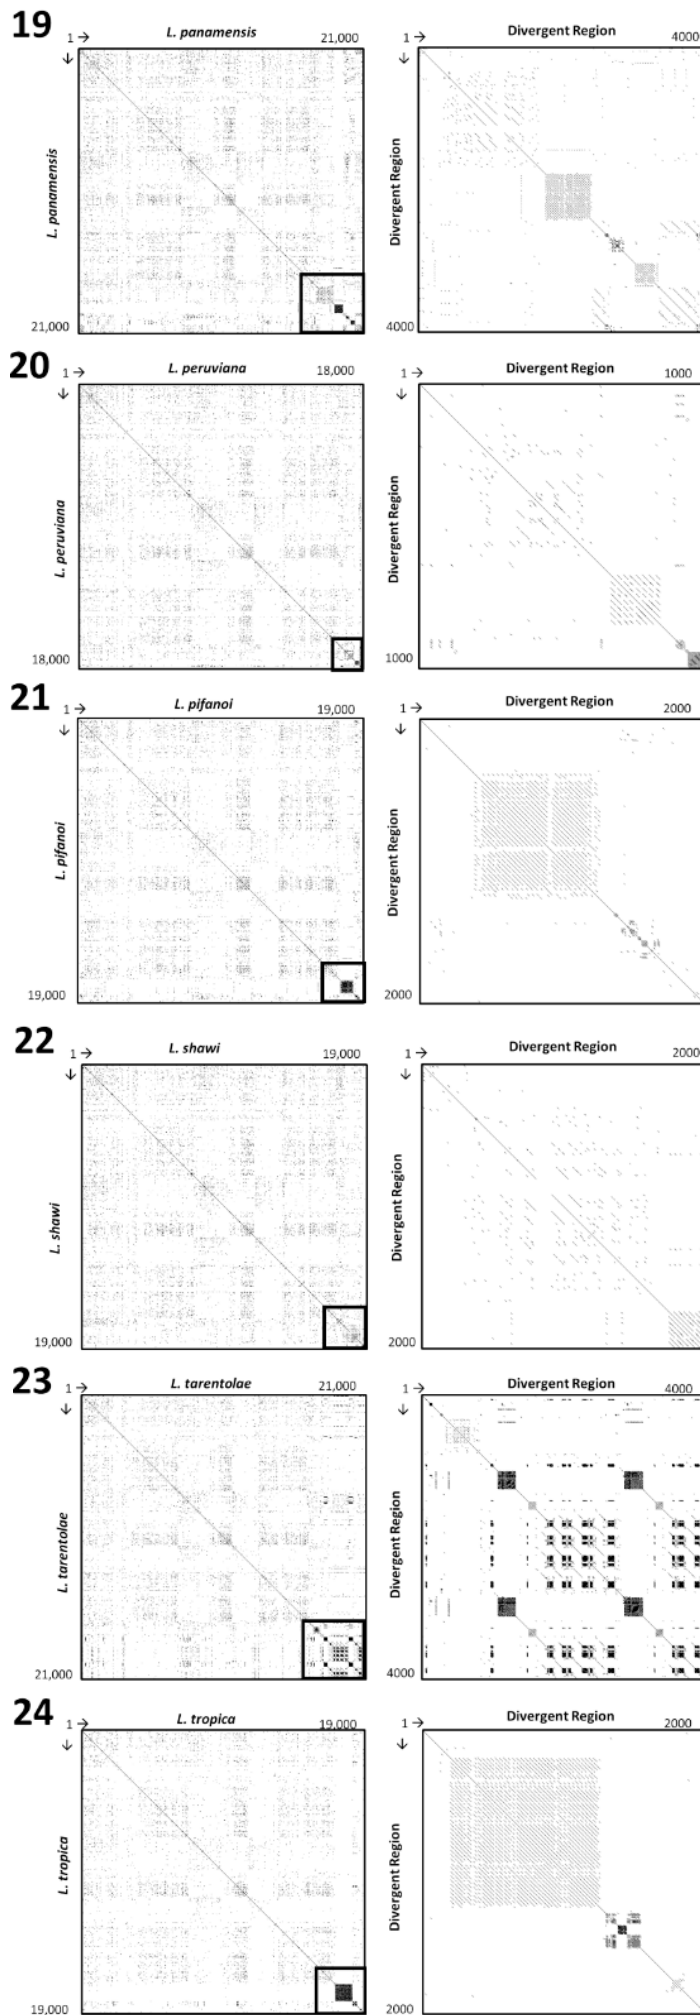

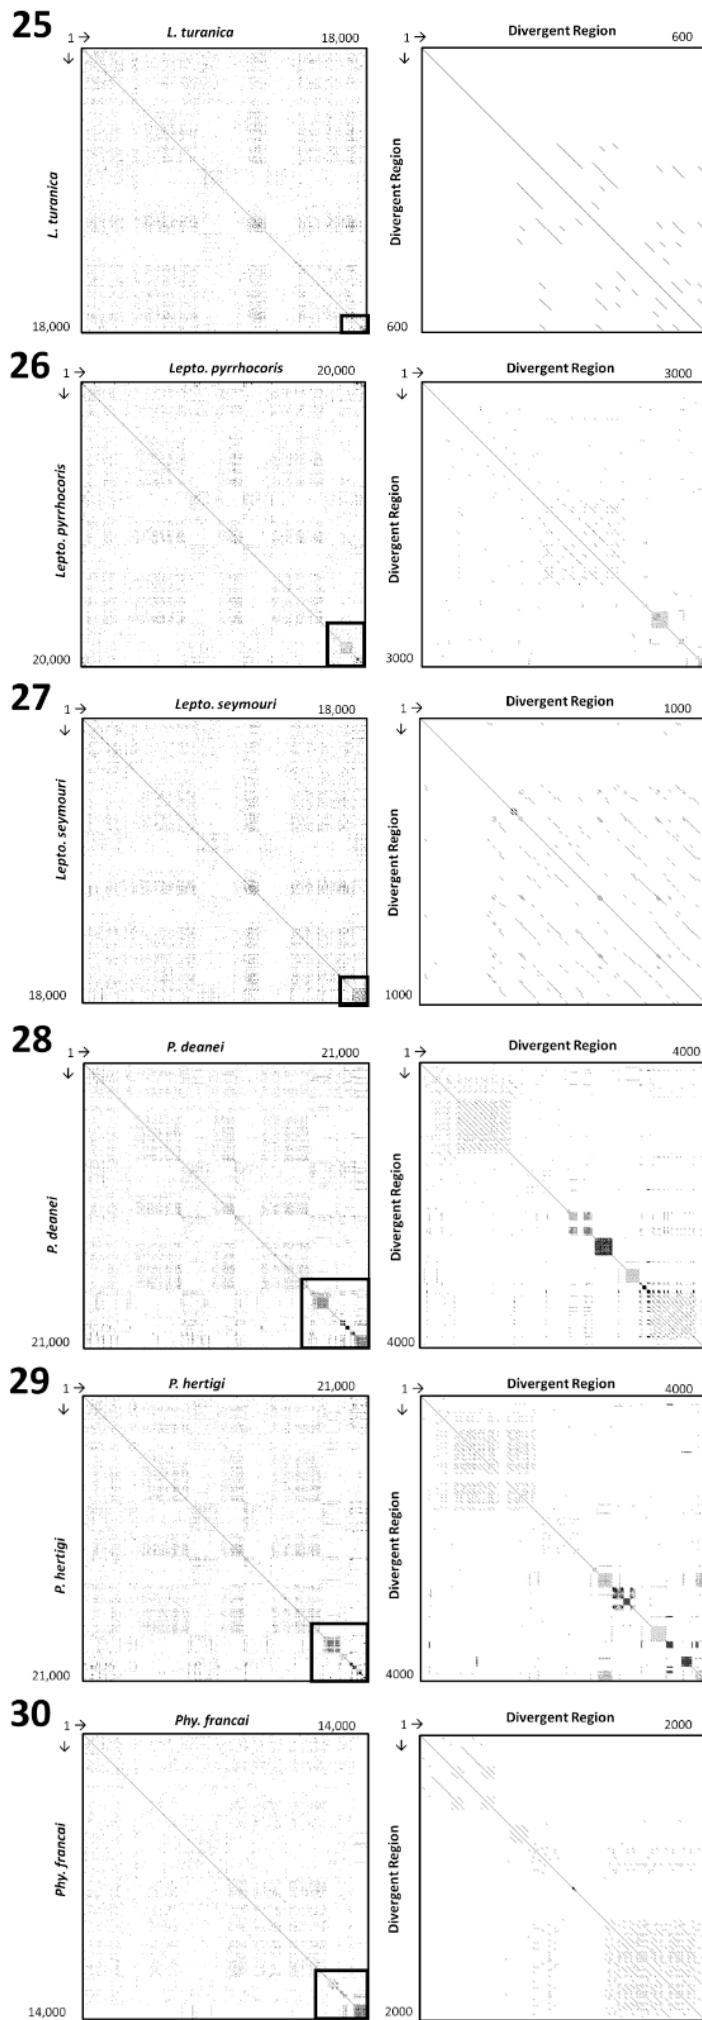



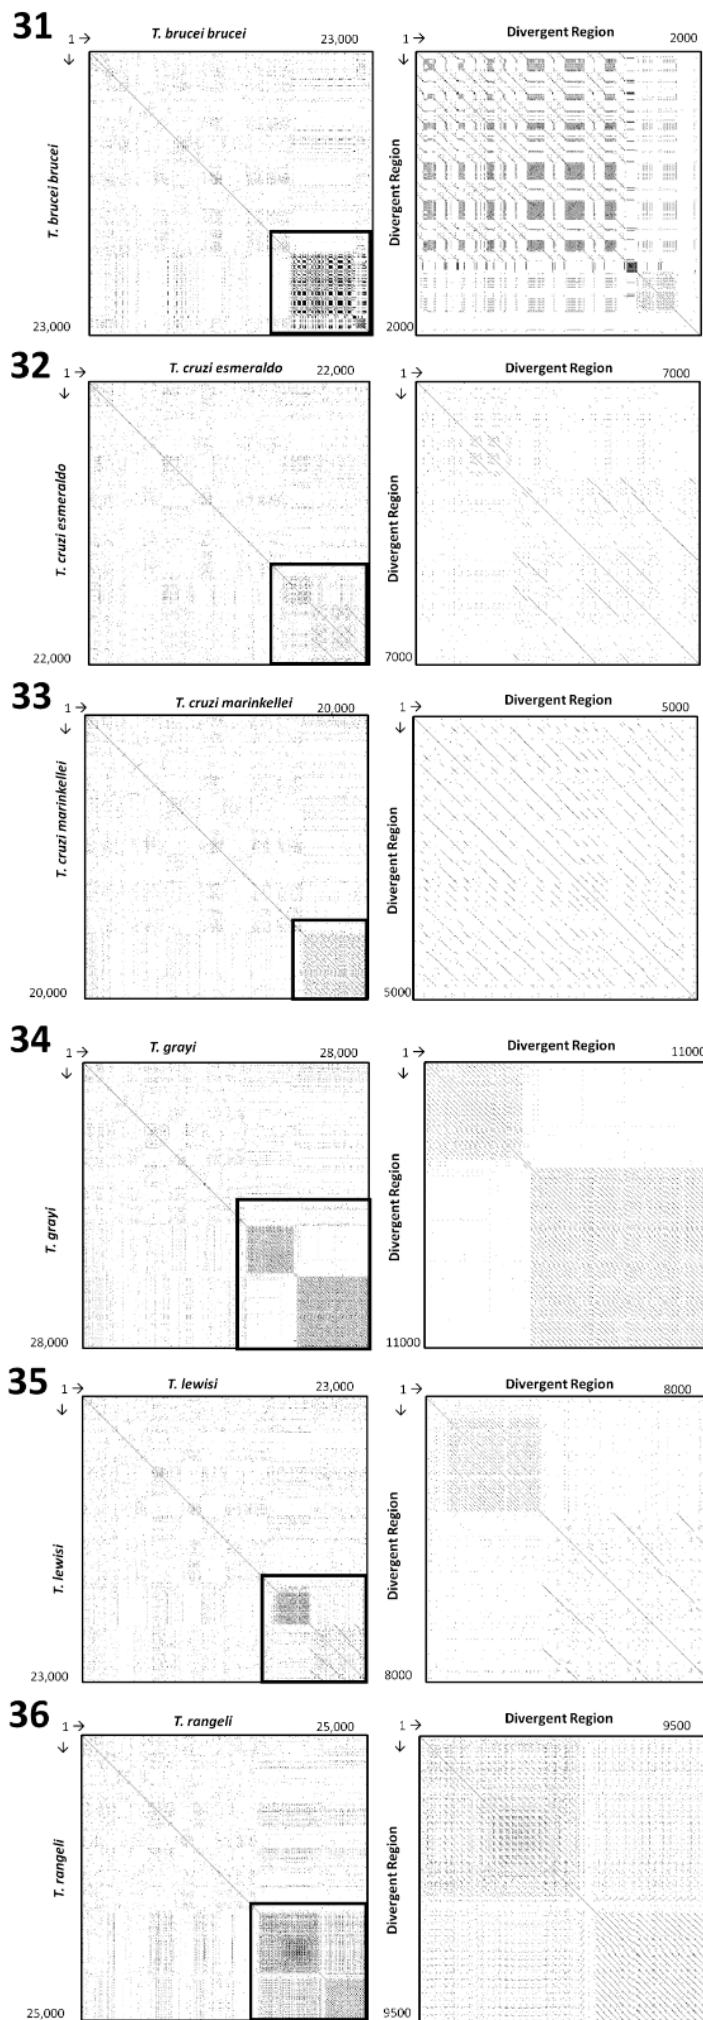

37

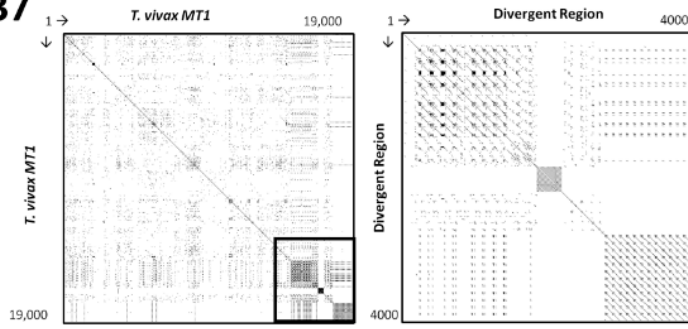

38

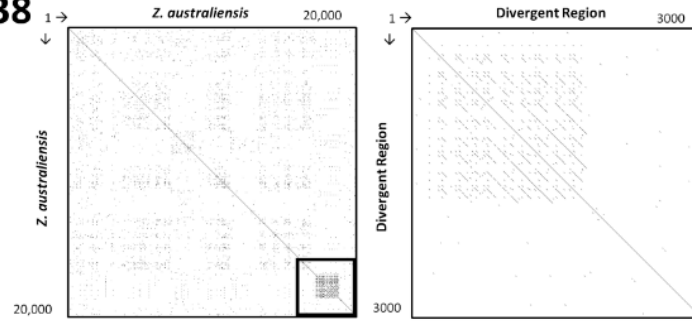

39

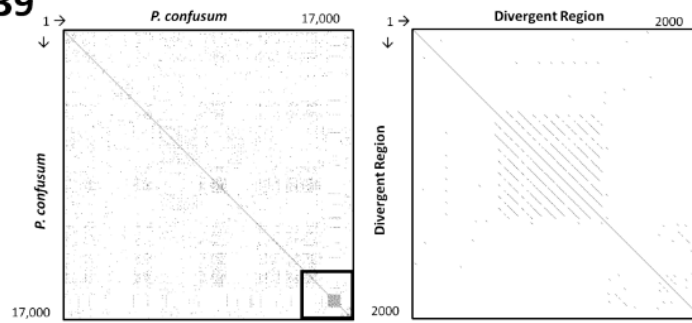

#### S4 - Analysis of repeated sequences in the maxicircle divergent region

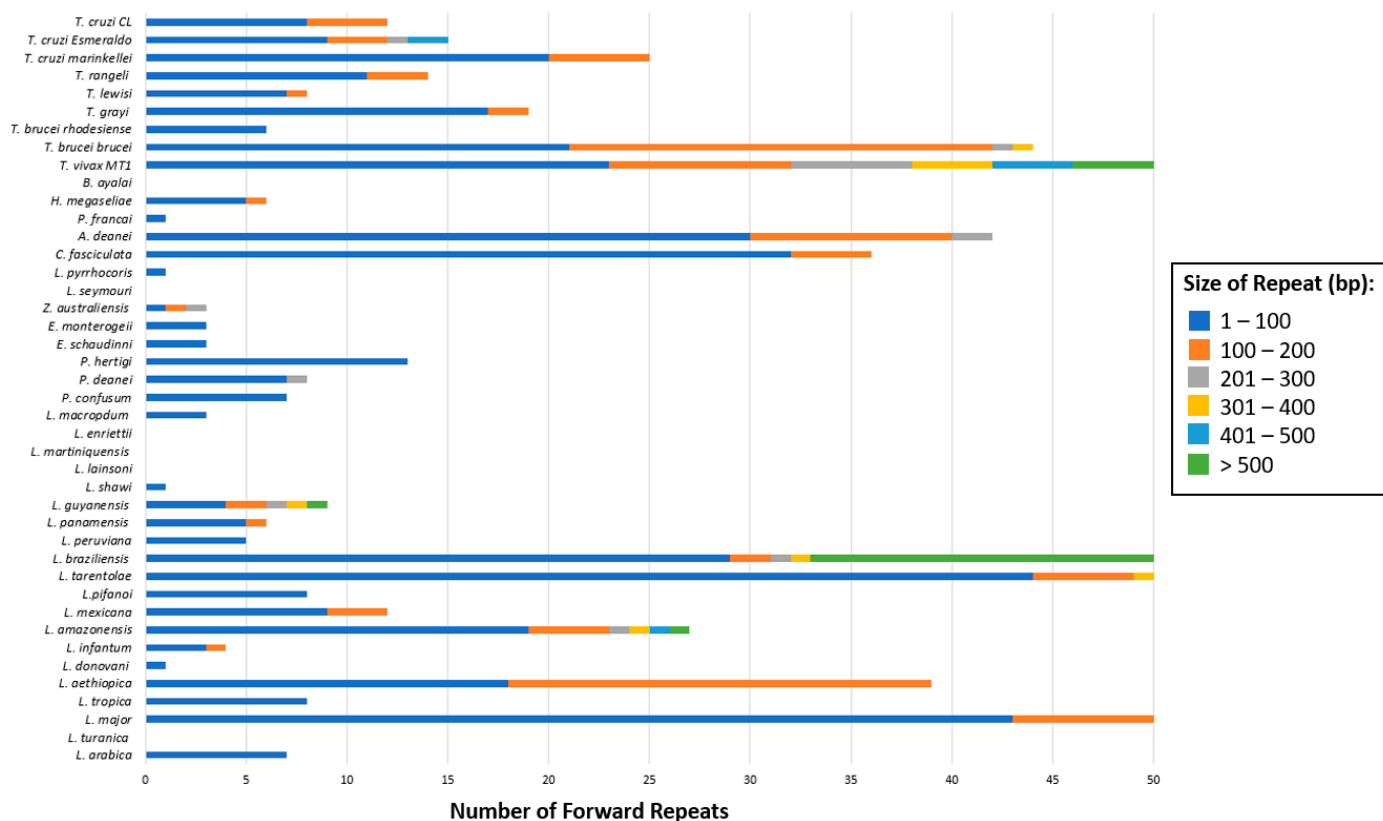

Figure S4-A: Analysis of forward repeats in the maxicircle divergent region 5 trypanosomatid species.

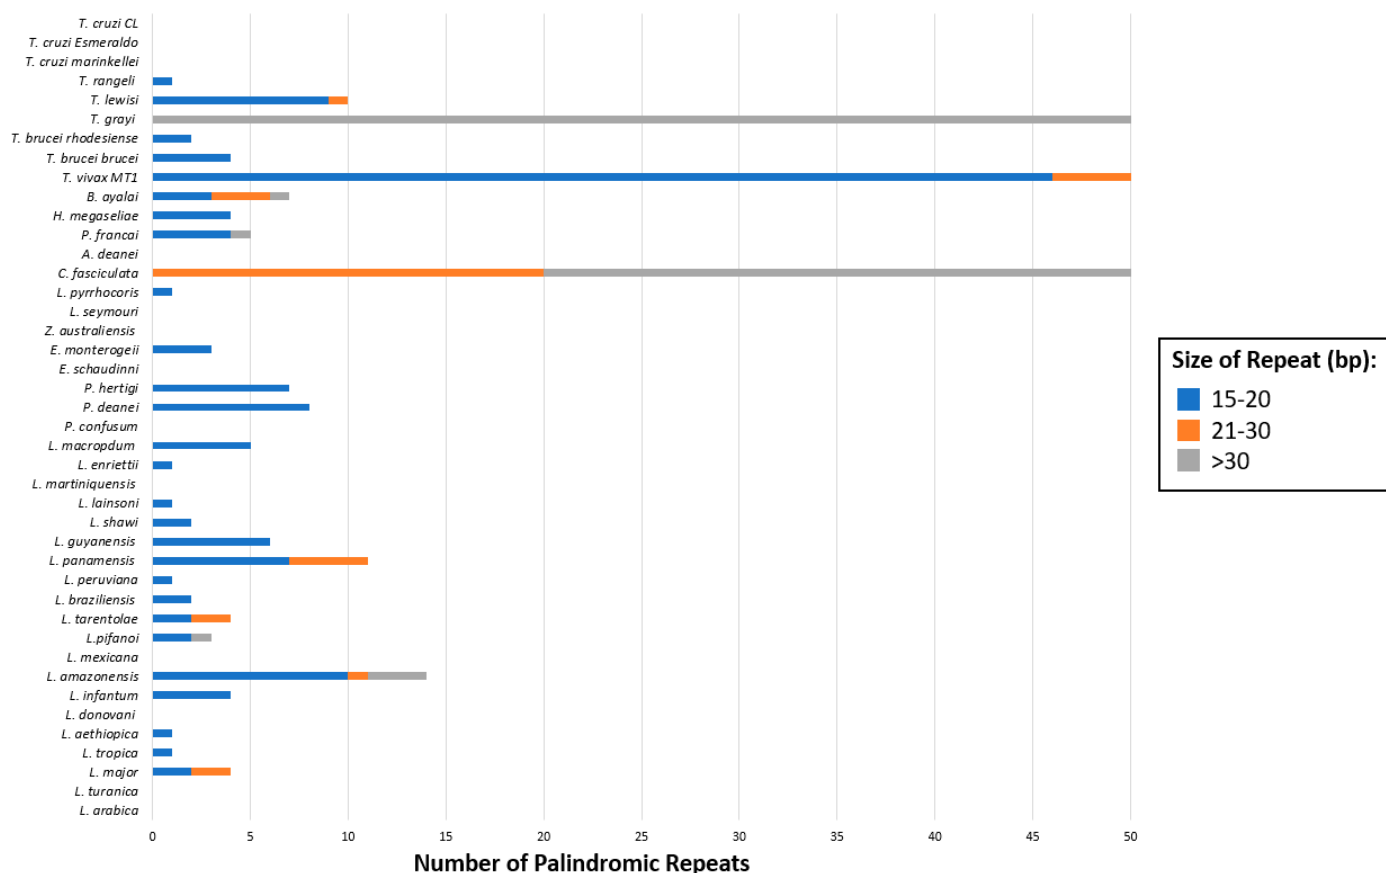

Figure S4-B: Analysis of palindromic repeats in the maxicircle divergent region 5 trypanosomatid species.

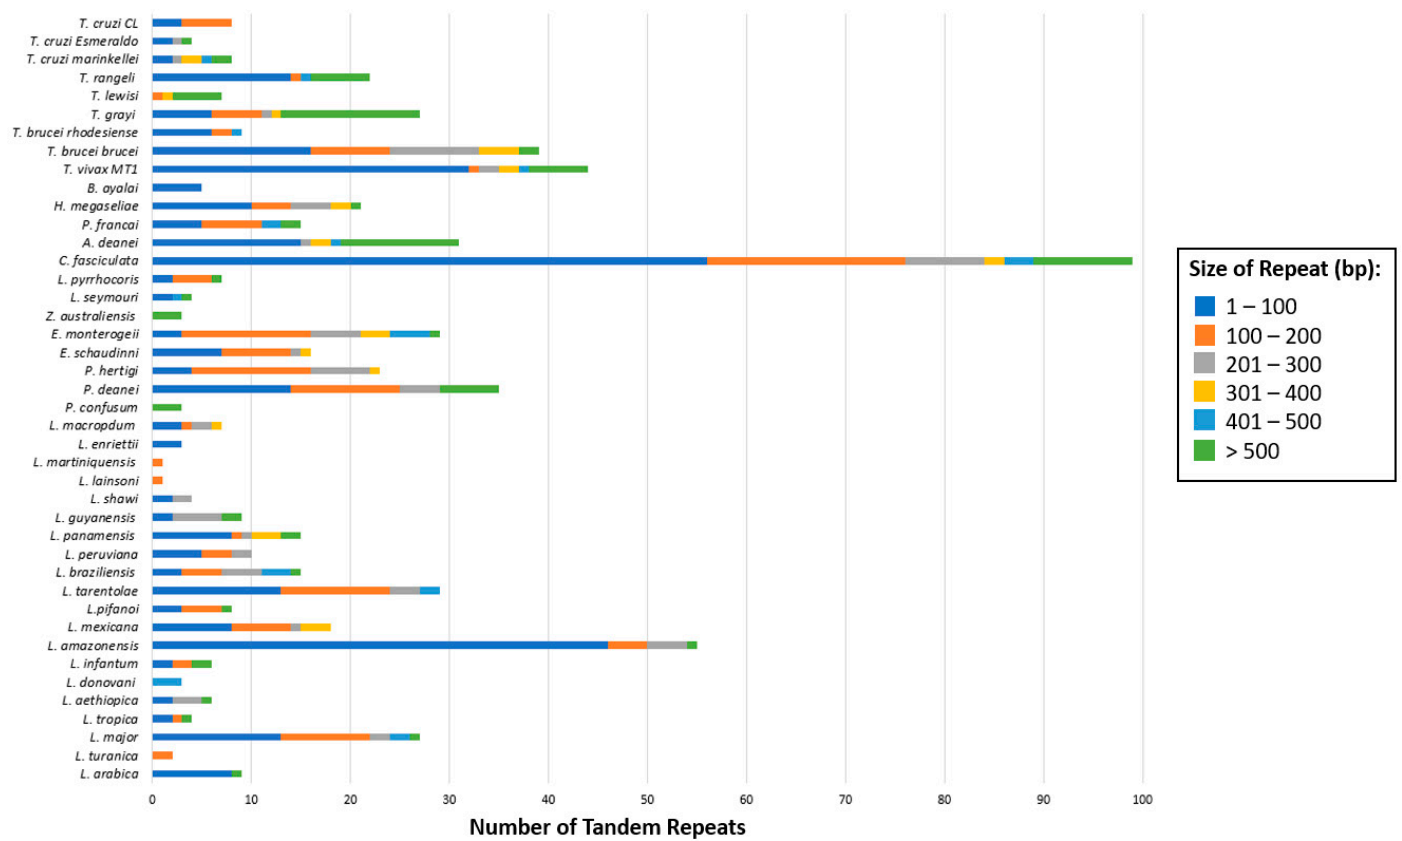

**Figure S4-C: Analysis of tandem repeats in the maxicircle divergent region 5 trypanosomatid species.**

**A**

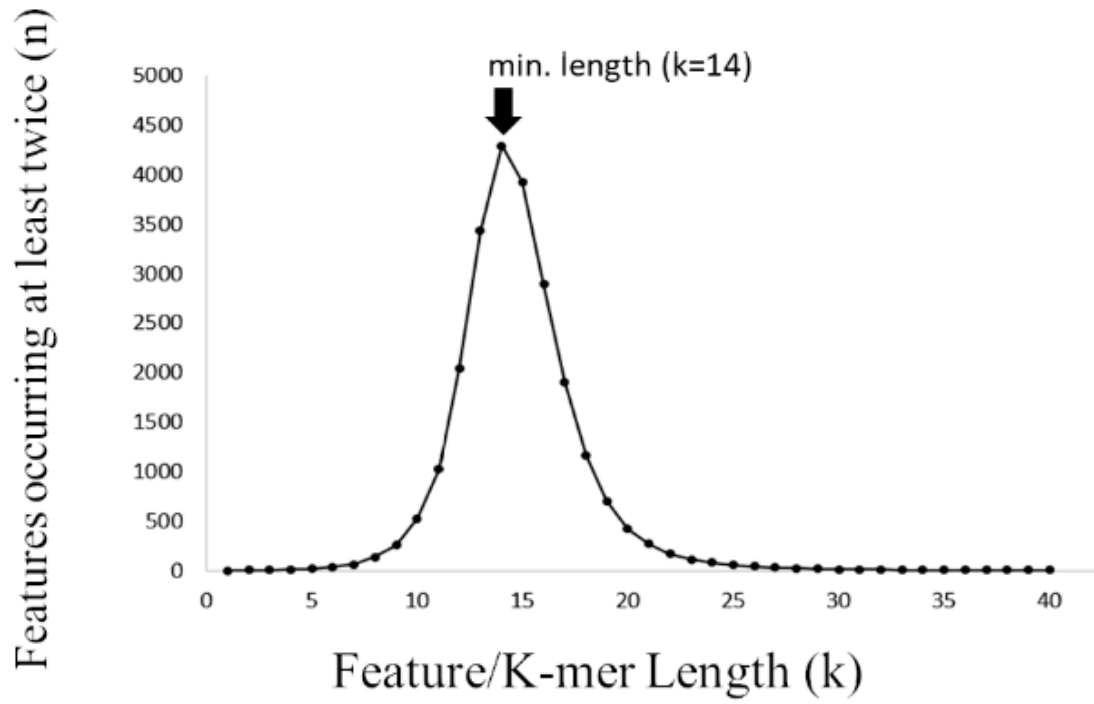

**B**

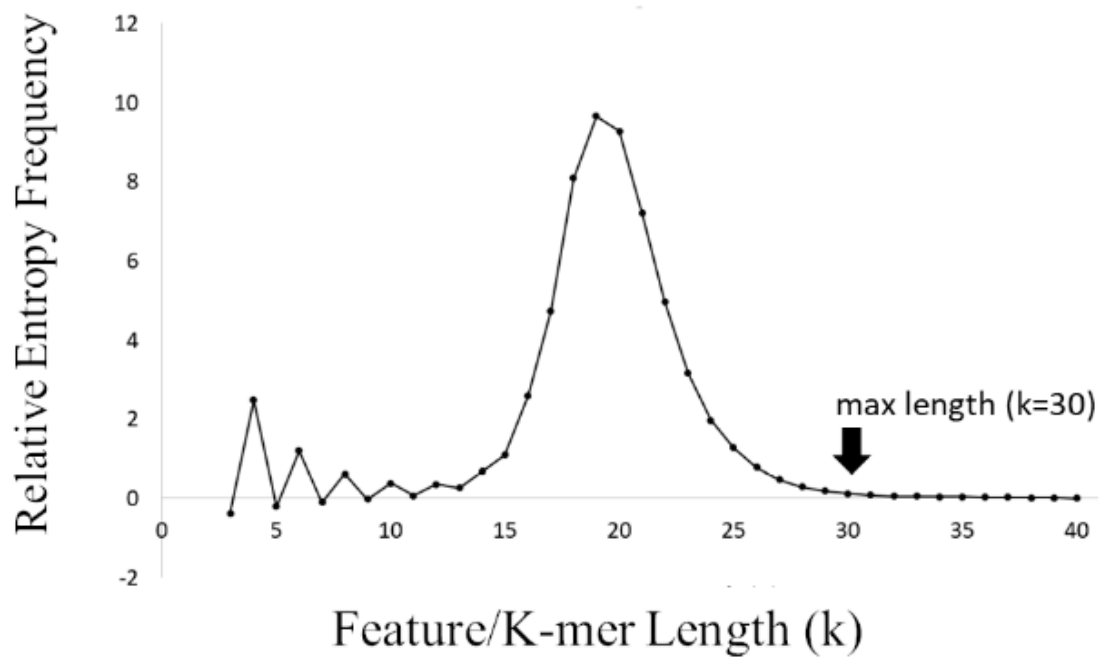

Supplement: s1 [file s1]
